# Supplementary material for: Robustness of Circadian Clocks to Daylight Fluctuations: Hints from the Picoeucaryote Ostreococcus tauri
Source: PubMed Central journal article supplement (PMC2978692; doi:10.1371/journal.pcbi.1000990), 2010-11-11

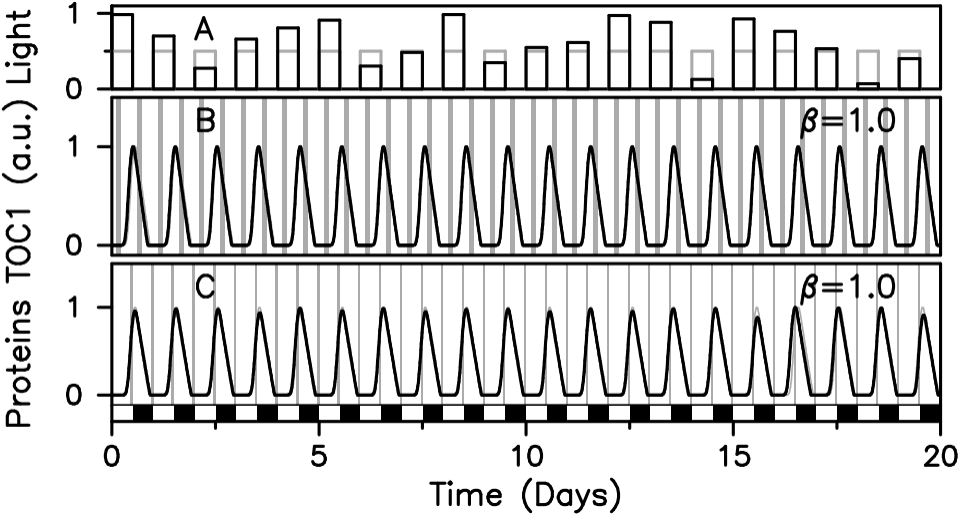

Supplement: pcbi.1000990.s007.pdf [file pcbi.1000990.s007.pdf]
